# Supplementary material for: New phases of 3d-transition metal–cerium binary compounds: an extensive structural search
Source: Royal Society of Chemistry journal article supplement (doi:10.1039/c7ra07103e), 2017-01-01
Supplement: c7ra07103e1.pdf [file c7ra07103e1.pdf]

# Electronic Supplementary Information

## **New Phases of 3d-Transition Metal-Cerium Binary Compounds: An Extensive Structural Search**

Xiaorui Sun<sup>1</sup>, Yawei Lei<sup>1</sup>, Rulong Zhou<sup>1\*</sup>, Bingyan Qu<sup>1</sup>, Dongdong Li<sup>1</sup>, Bo Zhang<sup>1</sup>, Xiao Cheng  
Zeng<sup>2,3\*</sup>

<sup>1</sup>*Laboratory of Amorphous Matter and Science, School of Materials Science and Engineering, Hefei  
University of Technology, Hefei, Anhui 230009, China*

<sup>2</sup>*Department of Chemistry, University of Nebraska-Lincoln, Lincoln, Nebraska 68588*

<sup>3</sup>*Collaborative Innovation Center of Chemistry for Energy Materials, University of Science and  
Technology of China, Hefei, Anhui 230026, China*

Emails: rlzhou@hfut.edu.cn; xzeng1@unl.edu

(a)

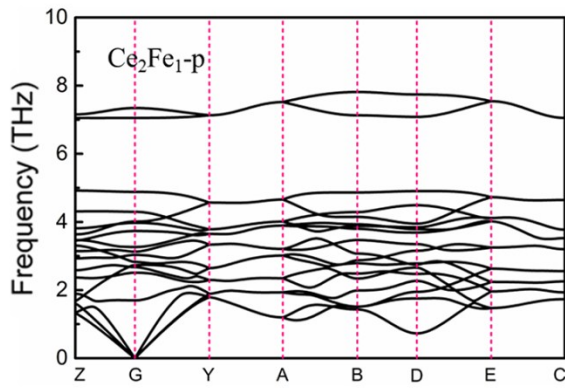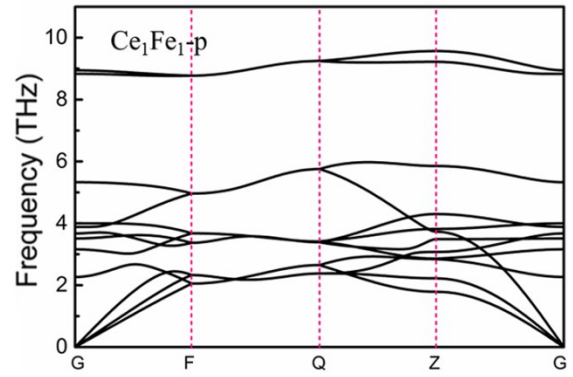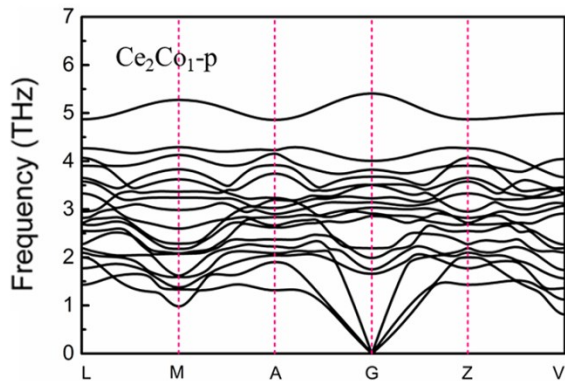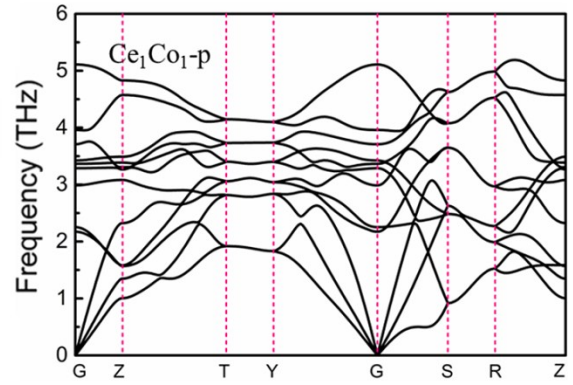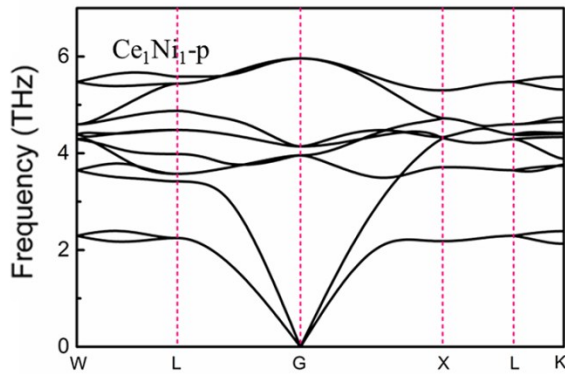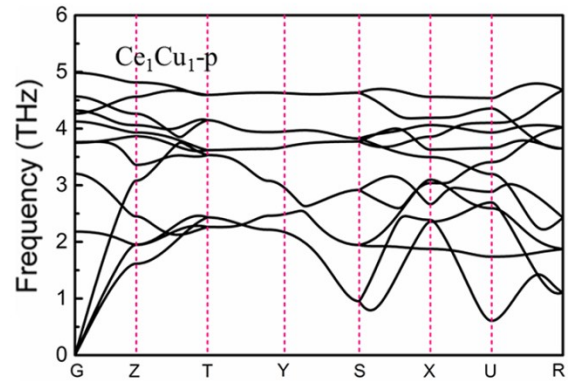

(b)

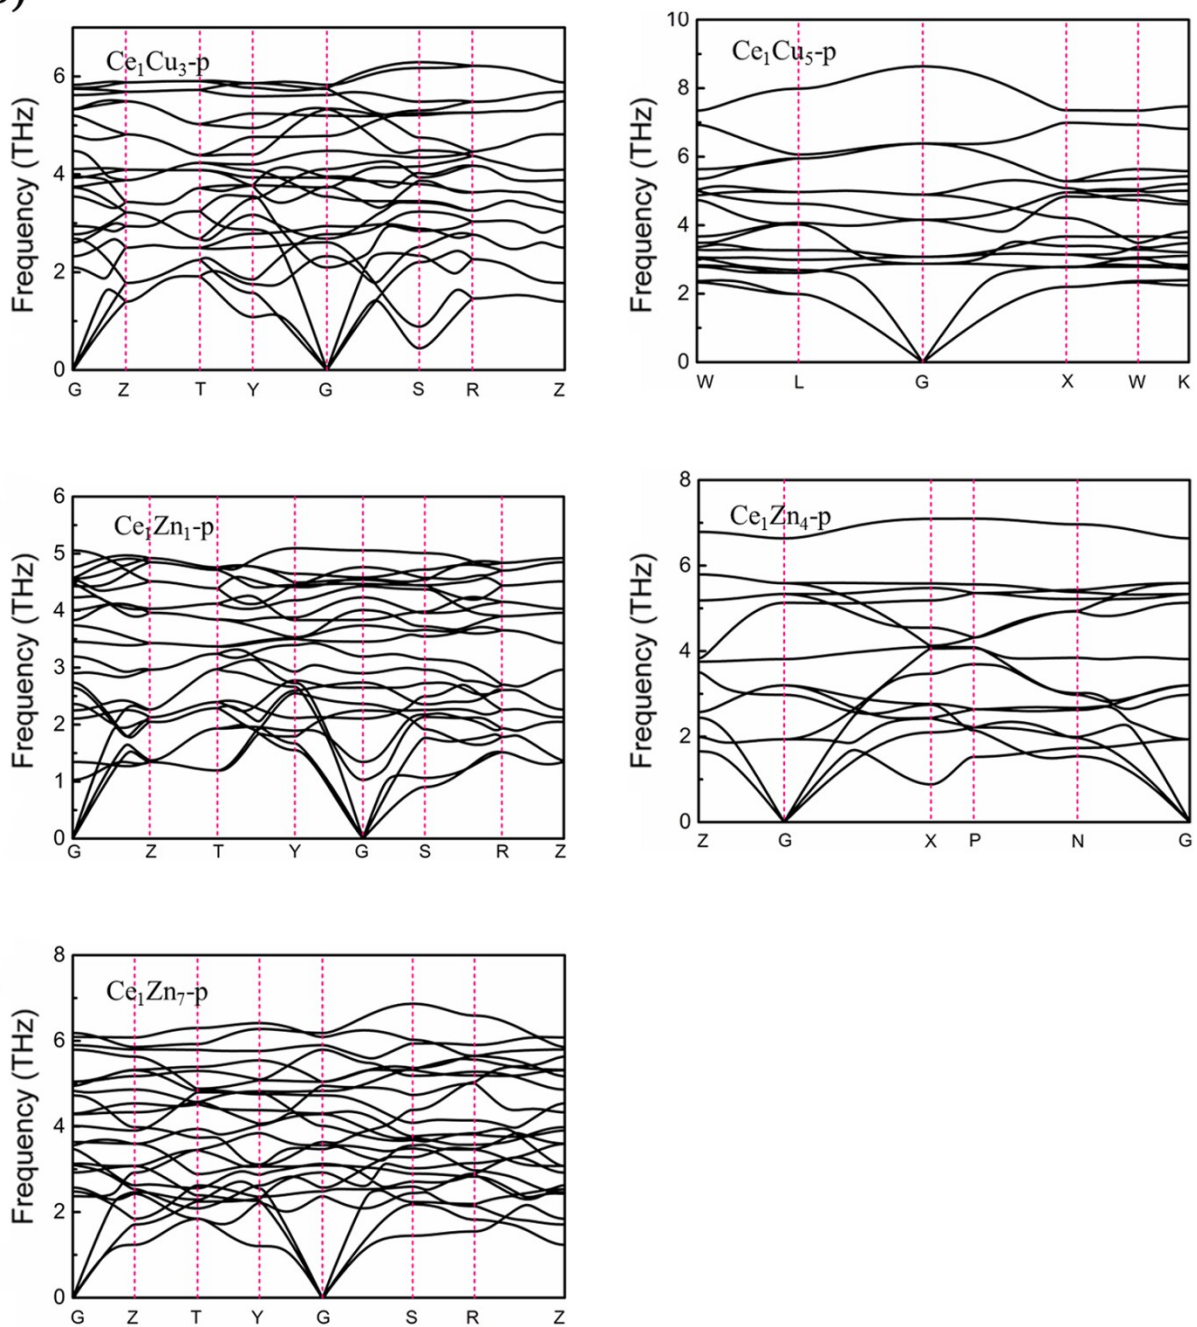

**Fig. S1.** The phonon spectra of all the predicted phases.

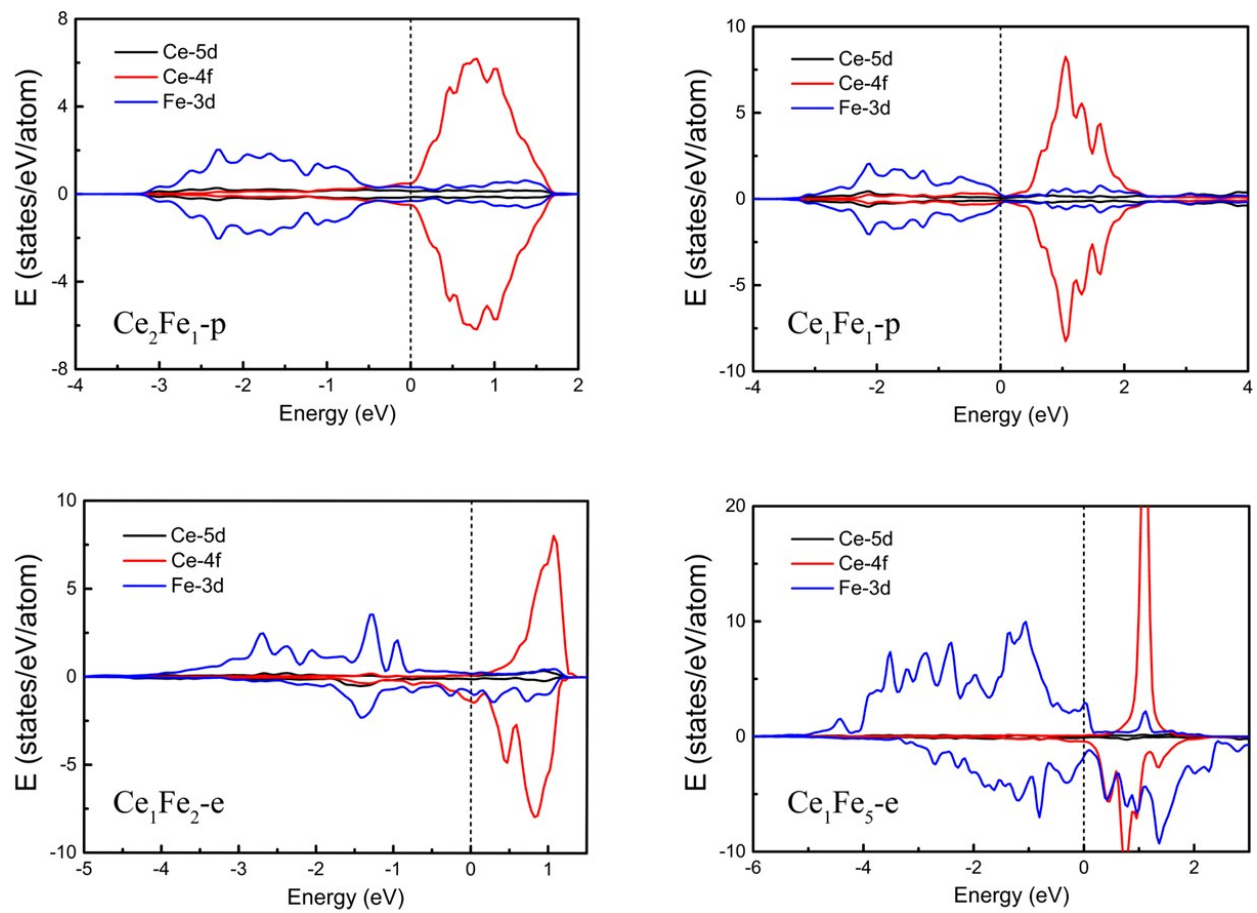

**Fig. S2.** The PDOS of the Ce-Fe system.

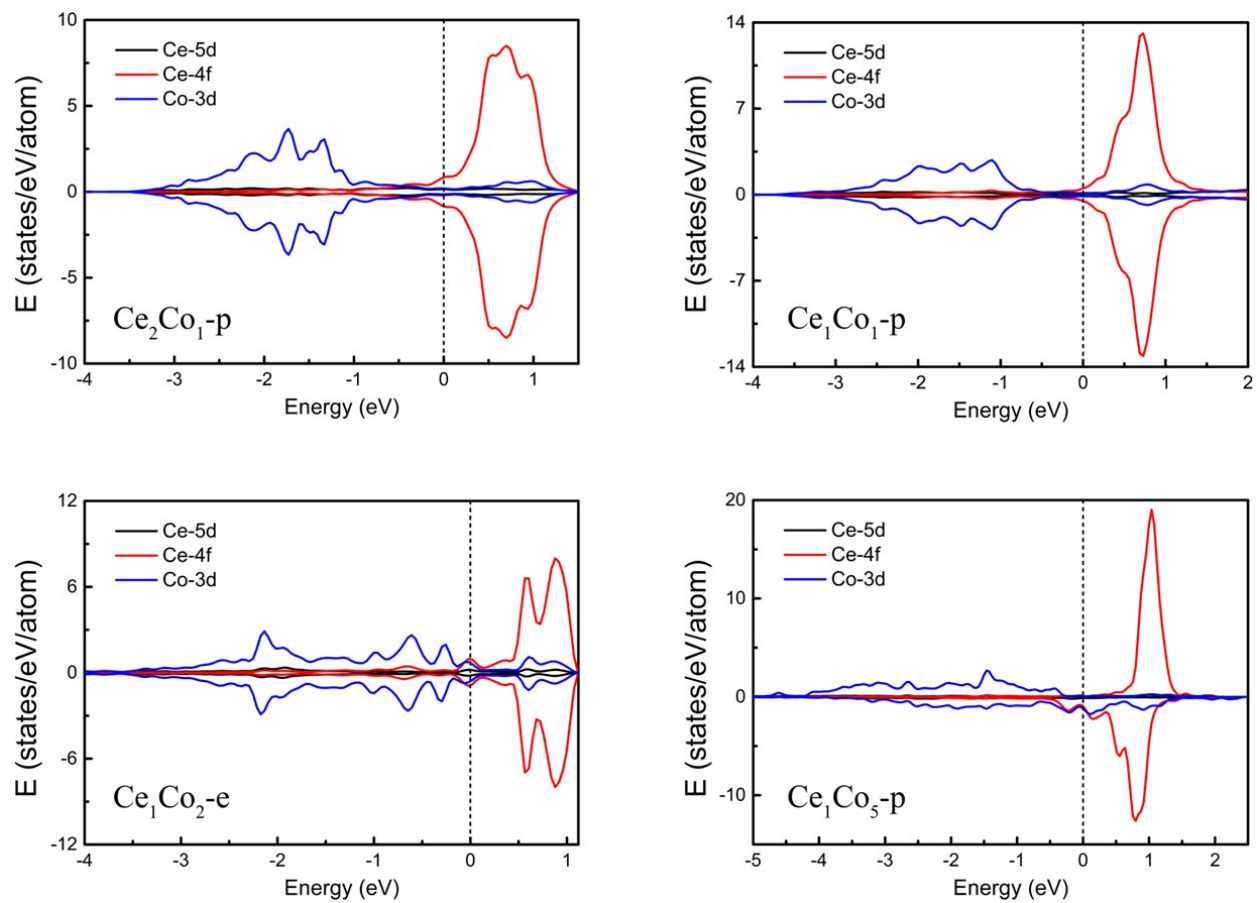

**Fig. S3.** The PDOS of the Ce-Co system.

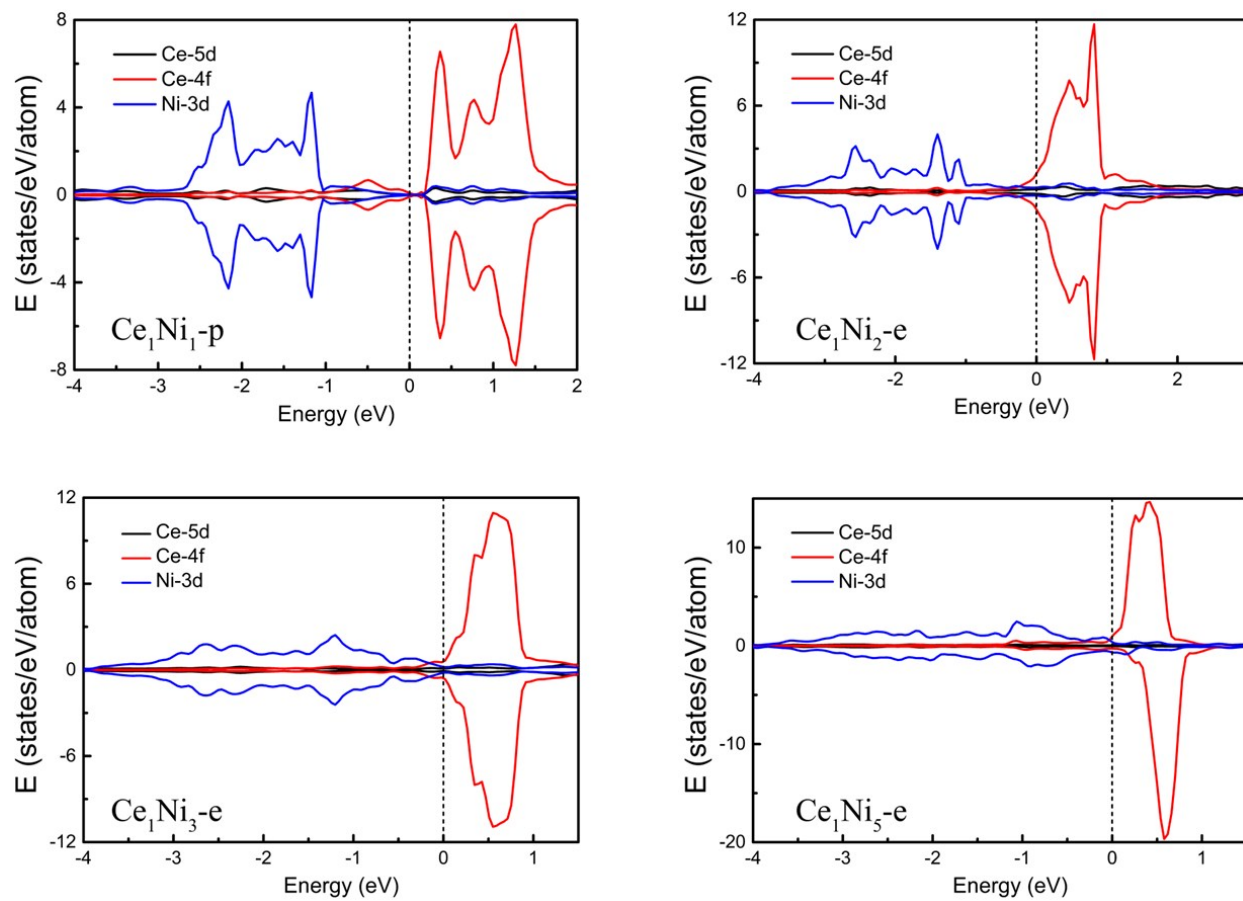

**Fig. S4.** The PDOS of the Ce-Ni system.

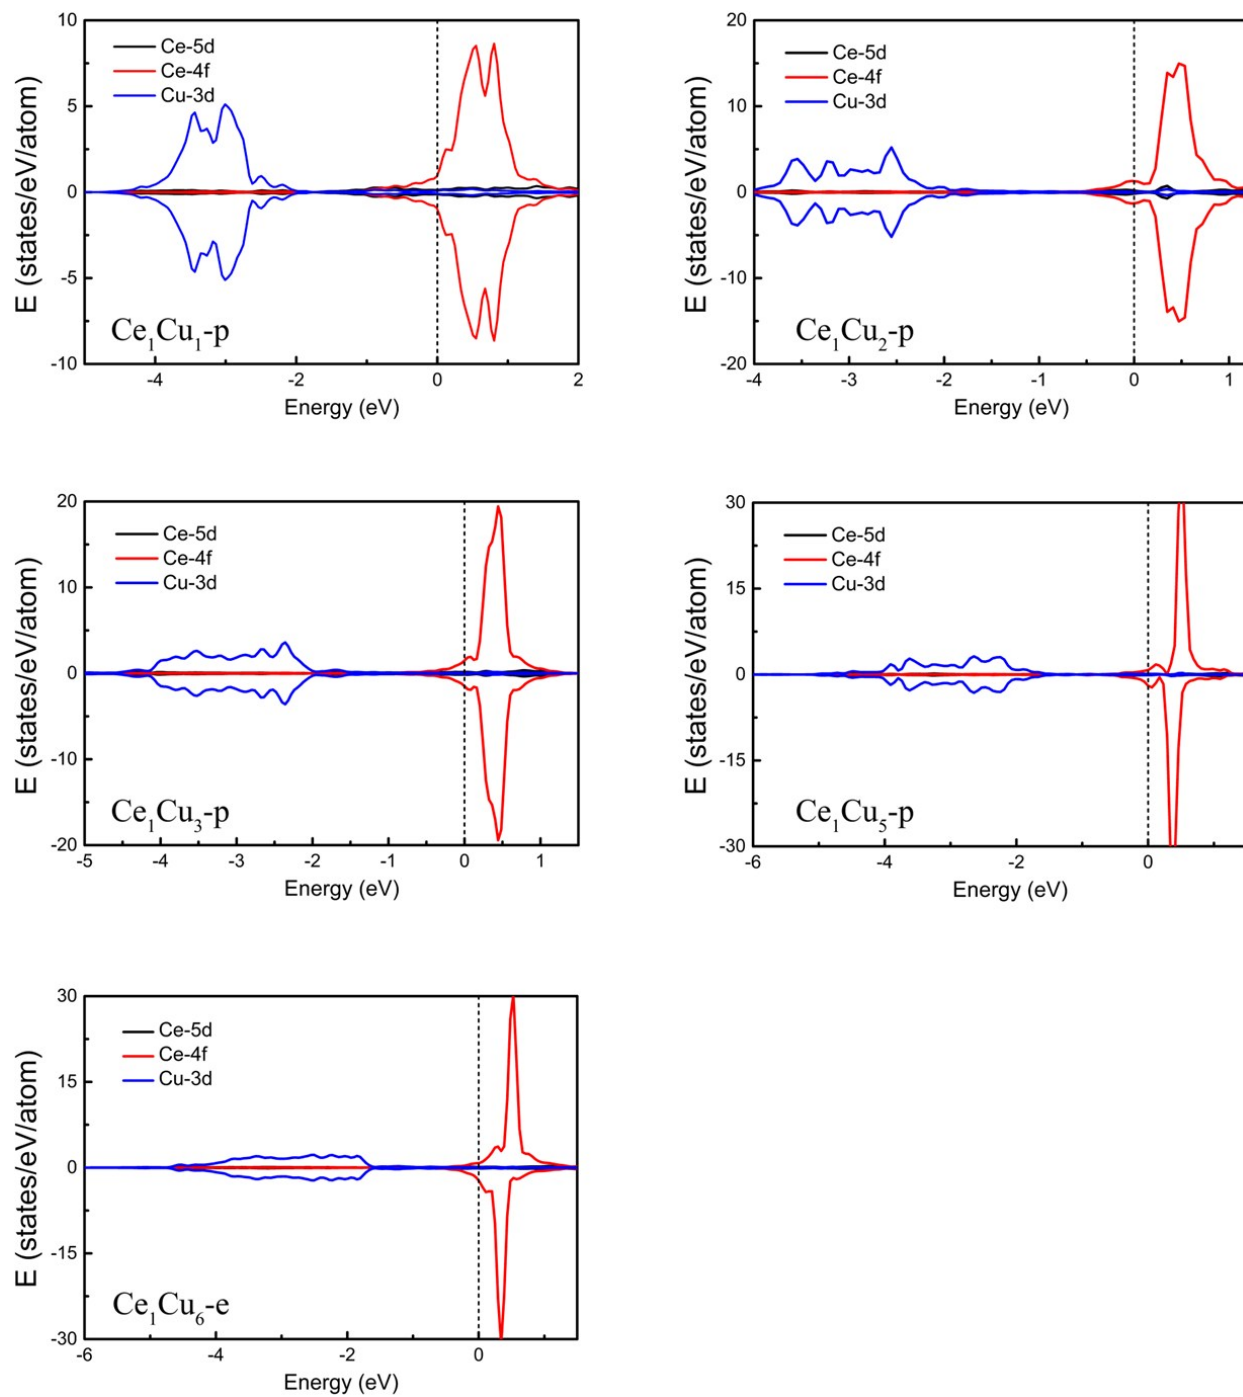

**Fig. S5.** The PDOS of the Ce-Cu system.

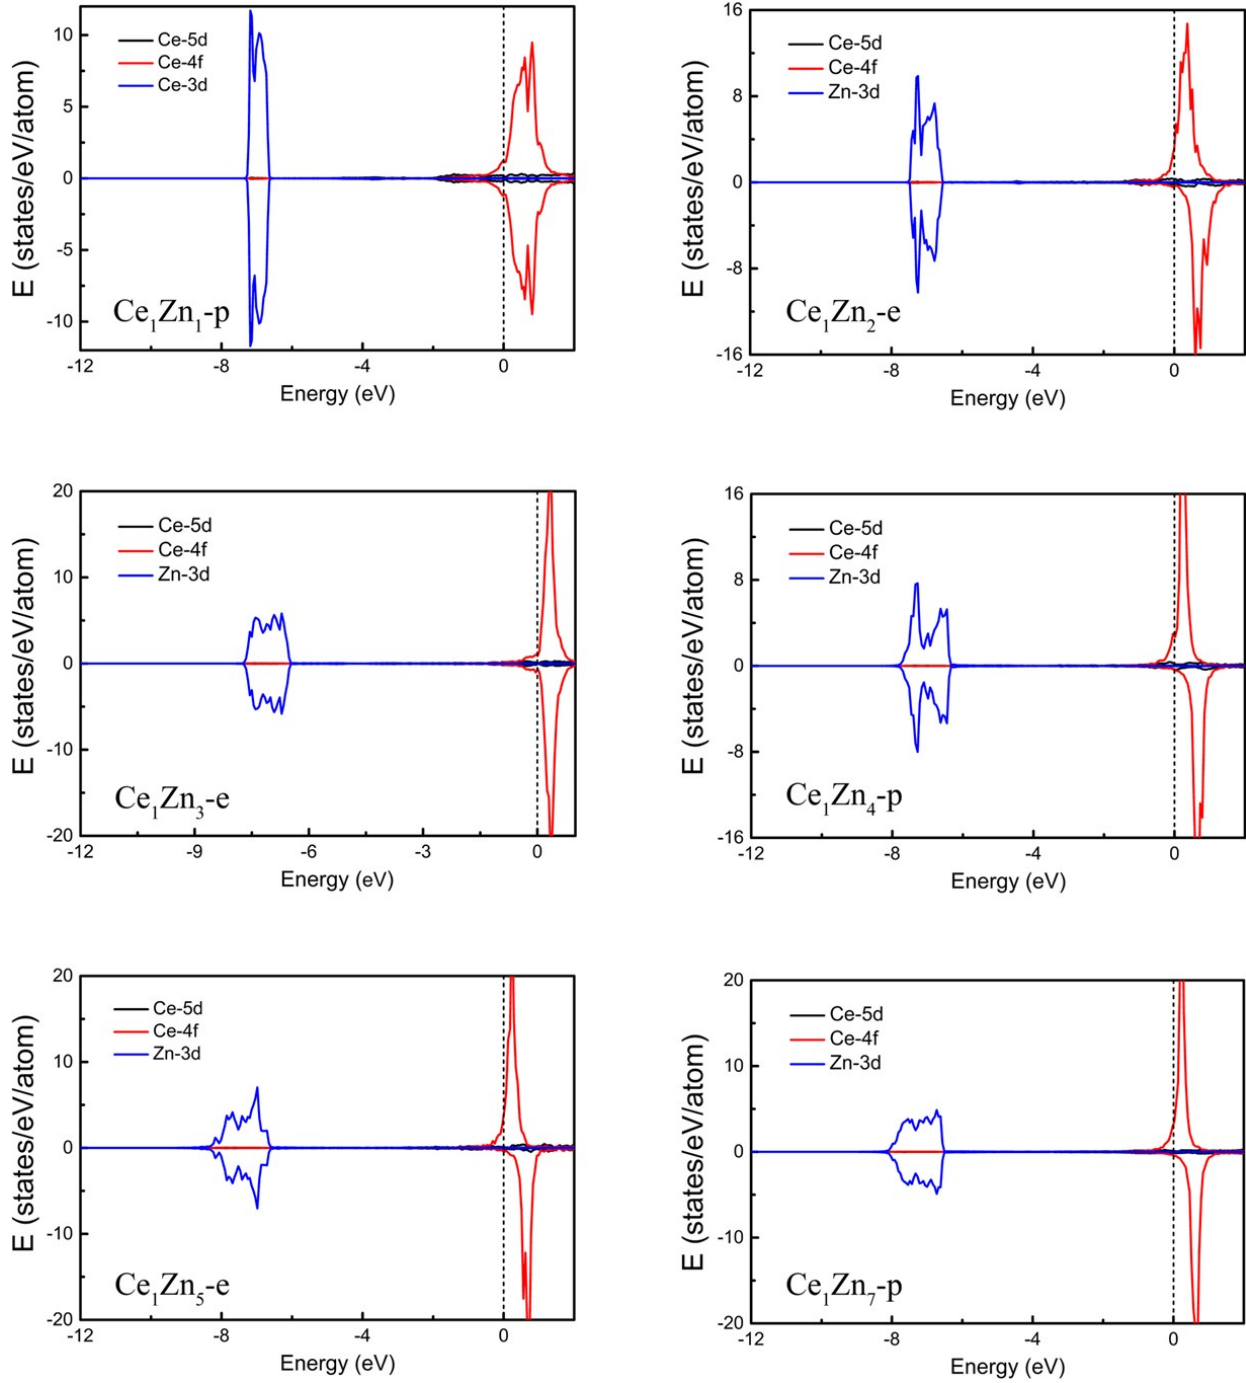

**Fig. S6.** The PDOS of the Ce-Zn system.



**Table S1.** The elastic constants  $C_{ij}$  (GPa) for the Ce-TM (TM=Fe, Co, Ni, Cu, Zn) systems.

| Phases                             | $C_{11}$ | $C_{22}$ | $C_{33}$ | $C_{44}$ | $C_{55}$ | $C_{66}$ | $C_{12}$ | $C_{13}$ | $C_{23}$ |
|------------------------------------|----------|----------|----------|----------|----------|----------|----------|----------|----------|
| Ce <sub>2</sub> Fe <sub>1</sub> -p | 106      | 81       | 65       | 38       | 14       | 30       | 52       | 46       | 26       |
| Ce <sub>1</sub> Fe <sub>1</sub> -p | 83       | 100      | 168      | 41       | 10       | 33       | 49       | 53       | 72       |
| Ce <sub>1</sub> Fe <sub>2</sub> -e | 119      | 119      | 119      | 18       | 18       | 18       | 83       | 83       | 83       |
| Ce <sub>1</sub> Fe <sub>5</sub> -e | 178      | 178      | 167      | 64       | 64       | 50       | 78       | 65       | 65       |
| Ce <sub>2</sub> Co <sub>1</sub> -p | 99       | 89       | 114      | 23       | 34       | 26       | 25       | 42       | 41       |
| Ce <sub>1</sub> Co <sub>1</sub> -p | 150      | 124      | 85       | 22       | 13       | 9        | 84       | 46       | 48       |
| Ce <sub>1</sub> Co <sub>2</sub> -e | 191      | 191      | 191      | 27       | 27       | 27       | 120      | 120      | 120      |
| Ce <sub>1</sub> Co <sub>5</sub> -e | 206      | 206      | 278      | 49       | 49       | 36       | 133      | 112      | 112      |
|                                    | 192      | 192      | 259      | 45       | 45       | 45       | 131      | 108      | 108      |
| Ce <sub>1</sub> Ni <sub>1</sub> -p | 185      | 185      | 185      | 79       | 79       | 79       | 96       | 96       | 96       |
| Ce <sub>1</sub> Ni <sub>2</sub> -e | 187      | 187      | 192      | 42       | 42       | 46       | 95       | 91       | 91       |
| Ce <sub>1</sub> Ni <sub>3</sub> -e | 169      | 169      | 184      | 43       | 43       | 50       | 69       | 47       | 47       |
| Ce <sub>1</sub> Ni <sub>5</sub> -e | 221      | 221      | 269      | 69       | 69       | 56       | 109      | 87       | 87       |
| Ce <sub>1</sub> Cu <sub>1</sub> -p | 138      | 101      | 62       | 42       | 51       | 45       | 70       | 17       | 42       |
| Ce <sub>1</sub> Cu <sub>2</sub> -e | 151      | 151      | 56       | 30       | 30       | 34       | 84       | 62       | 62       |
| Ce <sub>1</sub> Cu <sub>3</sub> -p | 107      | 179      | 60       | 30       | 66       | 29       | 57       | 45       | 40       |
| Ce <sub>1</sub> Cu <sub>5</sub> -p | 118      | 118      | 118      | 50       | 50       | 50       | 46       | 46       | 46       |
| Ce <sub>1</sub> Cu <sub>6</sub> -e | 148      | 119      | 178      | 4        | 52       | 9        | 82       | 53       | 73       |
| Ce <sub>1</sub> Zn <sub>1</sub> -p | 111      | 80       | 99       | 48       | 41       | 20       | 22       | 33       | 29       |
| Ce <sub>1</sub> Zn <sub>2</sub> -e | 104      | 109      | 115      | 36       | 33       | 21       | 43       | 43       | 44       |
| Ce <sub>1</sub> Zn <sub>3</sub> -e | 101      | 101      | 98       | 25       | 25       | 22       | 58       | 62       | 61       |
| Ce <sub>1</sub> Zn <sub>4</sub> -p | 113      | 110      | 106      | 33       | 30       | 31       | 49       | 47       | 49       |
| Ce <sub>1</sub> Zn <sub>5</sub> -e | 121      | 121      | 138      | 56       | 56       | 31       | 60       | 51       | 51       |
| Ce <sub>1</sub> Zn <sub>7</sub> -p | 109      | 143      | 117      | 39       | 41       | 51       | 36       | 54       | 34       |
